# Supplementary material for: Desmosomal cadherin association with Tctex-1 and cortactin-Arp2/3 drives perijunctional actin polymerization to promote keratinocyte delamination
Source: PubMed Central journal article supplement (PMC5849617; doi:10.1038/s41467-018-03414-6), 2018-03-13
Supplement: 41467_2018_3414_MOESM3_ESM.pdf [file 41467_2018_3414_MOESM3_ESM.pdf]

## **Description of Additional Supplementary Files**

File Name: Supplementary Movie 1

Description: E-cadherin-YFP-labeled cell-cell border of NHEKs expressing mCherry before and after laser ablation.

File Name: Supplementary Movie 2

Description: E-cadherin-YFP-labeled cell-cell border of NHEKs expressing Dsg1-FL before and after laser ablation.

File Name: Supplementary Movie 3

Description: E-cadherin-YFP-labeled cell-cell border of NHEKs expressing Dsg1-909 before and after laser ablation.

File Name: Supplementary Movie 4

Description: Behaviour of MDCK cells expressing GFP (green); >12 hours of recording.

File Name: Supplementary Movie 5

Description: Behavior of MDCK cells expressing Dsg1-GFP (green); >12 hours of recording.
